# Supplementary material
Source: publisher figshare collection journal article supplement (https://tandf.figshare.com/ndownloader/files/31582890)
Supplement: Supplementary file 1 [file 31582890]

**Supplementary Material**

**Table of Contents**

- **Table S1:** Baseline characteristics of patients stratified by scheduled indication …...……2
- **Table S2:** Multivariate analysis for predictors of LA/LAA thrombi or dense SEC ………3

**Table S1. Baseline characteristics of patients stratified by scheduled indication**

|  | **ECV**  **(n = 176)** | **CA**  **(n = 176)** | **p-value** |
| --- | --- | --- | --- |
| **Age (years)** | 67.6 ± 9.8 | 62.3 ± 9.4 | **< 0.001** |
| **Female sex** | 51 (29.0%) | 41 (23.3%) | 0.225 |
| **BMI (kg/m2)** | 27.3 ± 4.1 | 26.8 ± 4.4 | 0.338 |
| **Obesity** | 39 (22.2%) | 28 (15.7%) | 0.135 |
| **Hypertension** | 141 (80.1%) | 120 (68.2%) | **0.011** |
| **Smoking history** | 41 (40.6%) | 60 (59.4%) | 0.025 |
| **COPD** | 10 (5.7%) | 20 (11.4%) | 0.056 |
| **Heart failure** | 32 (18.2%) | 12 (6.8%) | **0.001** |
| **Diabetes mellitus** | 25 (14.2%) | 21 (11.9%) | 0.527 |
| **Dyslipidemia** | 65 (36.9%) | 59 (33.5%) | 0.503 |
| **Known PAD** | 15 (8.5%) | 11 (6.3%) | 0.415 |
| **Previous stroke/TIA** | 19 (10.8%) | 19 (10.8%) | 1.000 |
| **CHA2DS2-VASc** | 2.7 ± 1.5 | 2.00 ± 1.2 | **< 0.001** |
| **CHA2DS2-VASc > 3** | 50 (28.4%) | 19 (10.8%) | **< 0.001** |
| **Thyroid disease** | 30 (17.1%) | 30 (17.1%) | 1.000 |
| **AF/AFl at TEE** | 176 (100.0%) | 99 (56.3%) | **< 0.001** |
| **LVEF (%)** | 56.5 ± 10.6 | 60.5 ± 5.9 | **< 0.001** |
| **LA volume (ml/m2)** | 47.8 ± 14.4 | 44.1 ± 14.5 | **0.041** |
| **LAA velocity (cm/s)** | 39.6 ± 18.3 | 50.8 ± 22.9 | **< 0.001** |

**Legend**: AF/AFl: atrial fibrillation/atrial flutter; BMI: body mass index; CA: catheter ablation; ECV: electrical cardioversion; LA: left atrium; LAA: left atrial appendage; LVEF: left ventricular ejection fraction; PAD: peripheral artery disease; SEC: spontaneous echo contrast; TIA: transient ischemic attack.

**Table S2. Multivariate analysis for predictors of LA/LAA thrombi or dense SEC**

|  | **Overall** | | |
| --- | --- | --- | --- |
|  | OR | 95% CI | p-value |
| **LVEF** | 0.98 | 0.94 – 1.02 | 0.316 |
| **LAA velocity (cm/s)** | 0.96 | 0.93– 0.99 | **0.012** |
| **Enlarged LA** | 3.323 | 0.40 – 27.84 | 0.268 |
| **Obesity** | 5.49 | 1.99 – 15.16 | **0.001** |
| **CHA2DS2-VASc > 3** | 5.27 | 2.01 – 13.84 | **0.001** |
|  | **ECV group** | | |
| **LVEF** | 0.98 | 0.94 – 1.02 | 0.338 |
| **LAA velocity (cm/s)** | 0.95 | 0.91 – 0.99 | **0.016** |
| **Obesity** | 5.00 | 1.52 – 16.42 | **0.008** |
| **CHA2DS2-VASc > 3** | 6.56 | 2.20 – 19.57 | **0.001** |
|  | **CA group** | | |
| **LAA velocity (cm/s)** | 0.97 | 0.93 – 1.01 | 0.140 |
| **LA volume (ml/m2)** | 1.06 | 1.01 – 1.12 | **0.032** |
| **Obesity** | 2.20 | 0.34 – 14.09 | 0.405 |
| **CHA2DS2-VASc > 3** | 1.71 | 0.29 – 10.18 | 0.558 |
| **AF/AFl at TEE** | 2.33 | 0.24 – 22.76 | 0.468 |

**Legend**: AF/AFl: atrial fibrillation/atrial flutter; CA: catheter ablation; ECV: electrical cardioversion; LA/LAA: Left atrium/left atrium appendage; LVEF: left ventricular ejection fraction
